# Supplementary material for: The Role of Coral-Associated Bacterial Communities in Australian Subtropical White Syndrome of Turbinaria mesenterina
Source: PubMed Central journal article supplement (PMC3435329; doi:10.1371/journal.pone.0044243), 2012-09-06
Supplement: pone.0044243.s001.pdf [file pone.0044243.s001.pdf]

Table S1. Relative abundance of all sequenced clones from the culture-independent study, including indicator species presented in tables 2 and 3 and additional highly abundant clones.

| OTU  | Accession number(s)              | Nearest relative [accession number]                                                          | % Identity to nearest relative | RDP classifier taxon (80% confidence threshold)       | Mean number of clones per sample category |    |      |     |
|------|----------------------------------|----------------------------------------------------------------------------------------------|--------------------------------|-------------------------------------------------------|-------------------------------------------|----|------|-----|
|      |                                  |                                                                                              |                                |                                                       | H                                         | M  | D    | C   |
| 269  | EU780398<br>EU780397             | Uncultured bacterium (Associated with <i>Lophelia pertusa</i> (cold water coral)) [AM911391] | 91                             | Unclassified Gammaproteobacteria                      | 3                                         | 2  | 0    | 7   |
| 1094 | EU780418<br>EU780417<br>EU780402 | <i>Muricauda</i> sp. (Marine isolate) [AY576776]                                             | 93                             | <i>Flavobacteriaceae</i> (Genus <i>Muricauda</i> )    | 1                                         | 0  | 0    | 11  |
| 2029 | EU780404<br>EU780403             | Uncultured marine bacterium [FJ594861]                                                       | 99                             | <i>Flavobacteriaceae</i> (Unclassified)               | 0                                         | <1 | 0    | 4.5 |
| 2802 | EU780406<br>EU780405             | Uncultured <i>Bacteroidetes</i> bacterium (marine bacterioplankton) [AY580710]               | 94                             | Unclassified <i>Bacteroidetes</i>                     | 0                                         | 0  | <1   | 5   |
| 2921 | EU780400<br>EU780399             | Uncultured bacterium (isolated from rainbow trout gut) [AM179918.1]                          | 99                             | <i>Clostridiaceae</i> (Genus <i>Sarcina</i> )         | 0                                         | 1  | 0    | 54  |
| 2937 | EU780408<br>EU780407             | Uncultured bacterium (from pig gut) [AF371938.1]                                             | 95                             | Unclassified <i>Clostridiales</i>                     | 0                                         | 0  | 0    | 5   |
| 10   | EU780286<br>EU780285             | <i>Escherichia coli</i> DH1 [CP001637]                                                       | 100                            | <i>Enterobacteriaceae</i> (genus <i>Escherichia</i> ) | 7.667                                     | <1 | 0    | 1.5 |
| 165  | EU780321<br>EU780320             | Uncultured bacterium (nitrogen removing biofilm) [FM998994]                                  | 92                             | Unclassified bacteria                                 | 2                                         | 0  | 0    | 0   |
| 171  | EU780302<br>EU780301             | Uncultured alphaproteobacteria ( <i>Monastrea annularis</i> (coral) tissue) [DQ200437]       | 93                             | Unclassified alphaproteobacteria                      | 35.67                                     | 14 | 1.25 | 17  |
| 177  | EU780290<br>EU780289             | <i>Sphingopyxis</i> sp. MEBiC05060 (Marine sponge) [EU581700]                                | 99                             | <i>Sphingomonadaceae</i> (genus <i>Sphingopyxis</i> ) | 4.333                                     | 0  | 0    | <1  |
| 180  | EU780316                         | Uncultured alphaproteobacteria (Body wall lesions of sea urchin) [AM930440]                  | 99                             | <i>Rhodobactereaceae</i> (Unclassified)               | 1.667                                     | 1  | <1   | 0   |
| 182  | EU780318                         | Uncultured bacterium (marine microbial mat) [HQ153940]                                       | 97                             | Unclassified spirochaetales                           | 2.333                                     | 0  | 0    | 0   |
| 184  | EU780312<br>EU780311             | <i>Sphingopyxis</i> sp. MEBiC05060 (Marine sponge) [EU581700]                                | 98                             | <i>Sphingomonadaceae</i> (genus <i>Sphingopyxis</i> ) | 4.667                                     | <1 | <1   | <1  |
| 187  | EU780323<br>EU780322             | Uncultured bacterium ( <i>Montastrea faveolata</i> (coral)) [GU118637]                       | 93                             | Unclassified Clostridia                               | 2                                         | 0  | 0    | 0   |
| 191  | EU780310<br>EU780309             | Uncultured cyanobacterium (Antarctic lichen dominated cryptoendolithic community) [AY250874] | 97                             | Cyanobacteria Family IV (genus GpIV)                  | 5.667                                     | <1 | <1   | 0   |

\* Sample categories - C - Completely healthy coral colonies with no sign of ASWS, H - Apparently healthy tissue of colonies affected by ASWS, M - Margin of ASWS disease lesions, D - Exposed coral skeleton adjacent to margin of disease lesion

Table S1. Relative abundance of all sequenced clones from the culture-independent study, including indicator species presented in tables 2 and 3 and additional highly abundant clones.

| OTU | Accession number(s)  | Nearest relative [accession number]                                                                                                | % Identity to nearest relative | RDP classifier taxon (80% confidence threshold)          | Mean number of clones per sample category |     |    |      |
|-----|----------------------|------------------------------------------------------------------------------------------------------------------------------------|--------------------------------|----------------------------------------------------------|-------------------------------------------|-----|----|------|
|     |                      |                                                                                                                                    |                                |                                                          | H                                         | M   | D  | C    |
| 195 | EU780412<br>EU780411 | Uncultured alpha proteobacteria (associated with whale carcass) [AY922246]                                                         | 97                             | <i>Sphingomonadaceae</i> (Genus <i>Sphingopyxis</i> )    | 3                                         | 0   | <1 | <1   |
| 201 | EU780300<br>EU780299 | Uncultured bacterium ( <i>Montastrea franksi</i> (coral)) [GU118721]                                                               | 84                             | <i>Flavobacteriaceae</i> (unclassified)                  | 59                                        | 3.5 | <1 | 10.5 |
| 202 | EU780288<br>EU780287 | <i>Delftia tsuruhatensis</i> strain T7 (terephthalate-assimilating bacterium isolated from activated sludge) [NR_024786]           | 99                             | <i>Comamonadaceae</i> (genus <i>Delftia</i> )            | 5.667                                     | <1  | 0  | 2    |
| 225 | EU780306<br>EU780305 | Uncultured bacteria ( <i>Monastrea franksi</i> (coral)) [GU118721]                                                                 | 84                             | <i>Flavobacteriaceae</i> (unclassified)                  | 15.67                                     | 0   | 0  | 2.5  |
| 231 | EU780308<br>EU780307 | Uncultured bacterium (sawmill sink water) [FJ716306]                                                                               | 97                             | <i>Chlorobiaceae</i> (genus <i>Prosthecochloris</i> )    | 7.667                                     | 0   | 0  | 0    |
| 242 | EU780313             | Uncultured bacterium (sawmill sink water) [FJ716306]                                                                               | 97                             | <i>Chlorobiaceae</i> (genus <i>Prosthecochloris</i> )    | 3.667                                     | 0   | 0  | 0    |
| 248 | EU780410<br>EU780409 | Uncultured <i>Pseudomonas</i> (soil isolate) [AJ295645.1 UPS295645]                                                                | 86                             | Unclassified<br>Gammaproteobacteria                      | 4                                         | <1  | 0  | 0    |
| 270 | EU780414<br>EU780413 | <i>Escherichia coli</i> 536 [CP000247]                                                                                             | 99                             | <i>Enterobacteriaceae</i> Genus <i>Escherichia</i>       | 2                                         | <1  | <1 | 1    |
| 285 | EU780416<br>EU780415 | Uncultured <i>Bacteroidetes</i> bacterium (associated with sea urchin) [AY222319]                                                  | 96                             | Unclassified <i>Bacteroidetes</i>                        | 2                                         | 0   | <1 | 1    |
| 320 | EU780292<br>EU780291 | <i>Comamonas</i> sp. M2T2B14 (mixture of bovine dung and urine, cow's milk, and yogurt undergoing aerobic fermentation) [GQ246691] | 99                             | <i>Comamonadaceae</i> (genus <i>Comamonas</i> )          | 2.667                                     | <1  | 0  | 1    |
| 348 | EU780294<br>EU780293 | Uncultured bacterium (wound of mouse skin) [HM820111]                                                                              | 99                             | <i>Comamonadaceae</i> (genus <i>Comamonas</i> )          | 2                                         | 0   | 0  | <1   |
| 364 | EU780324             | Uncultured <i>Ruegeria</i> sp. (coral mucus) [FJ695550]                                                                            | 100                            | <i>Rhodobacteraceae</i> (genus <i>Ruegeria</i> )         | 1                                         | <1  | <1 | 0    |
| 389 | EU780315<br>EU780314 | Uncultured planctomycete (marine microbial mat) [AB294955]                                                                         | 99                             | <i>Planctomycetaceae</i> (genus <i>Rhodopirellula</i> )  | 1.333                                     | 1   | 0  | 1    |
| 390 | EU780295             | Uncultured bacterium [HM186874]                                                                                                    | 99                             | <i>Xanthomonadaceae</i> (genus <i>Stenotrophomonas</i> ) | 1.667                                     | 0   | 0  | 1    |

\* Sample categories - C - Completely healthy coral colonies with no sign of ASWS, H - Apparently healthy tissue of colonies affected by ASWS, M - Margin of ASWS disease lesions, D - Exposed coral skeleton adjacent to margin of disease lesion

Table S1. Relative abundance of all sequenced clones from the culture-independent study, including indicator species presented in tables 2 and 3 and additional highly abundant clones.

| OTU  | Accession number(s)  | Nearest relative [accession number]                                            | % Identity to nearest relative | RDP classifier taxon (80% confidence threshold) | Mean number of clones per sample category |     |      |      |
|------|----------------------|--------------------------------------------------------------------------------|--------------------------------|-------------------------------------------------|-------------------------------------------|-----|------|------|
|      |                      |                                                                                |                                |                                                 | H                                         | M   | D    | C    |
| 406  | EU780319             | Uncultured bacterium (Montastrea franksi (coral)) [GU118721]                   | 84                             | Flavobacteriaceae (unclassified)                | 1.667                                     | 0   | 0    | 1    |
| 441  | EU780296             | Uncultured bacterium (Human intestinal pouch) [GQ157102]                       | 99                             | Pseudomonadaceae (genus Pseudomonas)            | 1.667                                     | 0   | 0    | 1    |
| 843  | EU780325             | Uncultured bacterium (Porites asteroides (coral)) [GU118926]                   | 92                             | Unclassified cyanobacteria                      | 1.667                                     | 0   | <1   | 0    |
| 989  | EU780327<br>EU780326 | Uncultured bacterium (marine sediment) [GQ259310]                              | 96                             | Flavobacteriaceae (unclassified)                | 2                                         | 0   | 0    | 0    |
| 1014 | EU780317             | Uncultured alphaproteobacteria (Monastrea annularis (coral) tissue) [DQ200437] | 94                             | Unclassified alphaproteobacteria                | 2.333                                     | 0   | 0    | <1   |
| 1960 | EU780298<br>EU780297 | Uncultured proteobacteria (seawater) [Z31658]                                  | 92                             | Unclassified Gammaproteobacteria                | 2.333                                     | 0   | 0    | 0    |
| 236  | EU780304<br>EU780303 | Uncultured bacterium [HM186874]                                                | 99                             | Xanthomonadaceae (genus Stenotrophomonas)       | 20.33                                     | 4.5 | 0    | 21.5 |
| 302  | EU780355             | Uncultured bacterium (metallic artificial reef) [FJ594828]                     | 96                             | Rhodobactereaceae (Unclassified)                | <1                                        | 0   | 3    | 1    |
| 457  | EU780357<br>EU780356 | Shimia marina [AY962292]                                                       | 99                             | Rhodobactereaceae (Genus Shimia)                | 0                                         | <1  | 3.5  | 0    |
| 468  | EU780344<br>EU780343 | Uncultured bacterium (leaf packs in woodland stream) [GU568990]                | 94                             | Chloroplast of Bacillariophyta (diatom)         | 0                                         | 1   | 5.25 | 0    |
| 487  | EU780331             | Uncultured bacterium (black band diseased coral) [EF123421]                    | 98                             | Rhodobactereaceae (Unclassified)                | <1                                        | 1   | 3    | 2    |
| 503  | EU780371<br>EU780370 | Uncultured bacterium (metallic artificial reef)                                | 99                             | Cyanobacteria Family IV (genus GpIV)            | <1                                        | <1  | 1.25 | 0    |
| 524  | EU780381<br>EU780382 | Amphitrea atlantica [AM156910]                                                 | 97                             | Oceanospirillaceae (Genus Amphritea)            | 0                                         | <1  | 1.25 | 0    |
| 536  | EU780336             | Uncultured bacterium (leaf packs in woodland stream) [GU568990]                | 95                             | Chloroplast of Bacillariophyta (diatom)         | 0                                         | <1  | 1.25 | 0    |
| 546  | EU780362             | Uncultured alphaproteobacterium (marine sediment) [DQ289901]                   | 96                             | Rhodobactereaceae (Unclassified)                | 0                                         | 1   | 2.25 | 0    |

\* Sample categories - C - Completely healthy coral colonies with no sign of ASWS, H - Apparently healthy tissue of colonies affected by ASWS, M - Margin of ASWS disease lesions, D - Exposed coral skeleton adjacent to margin of disease lesion

Table S1. Relative abundance of all sequenced clones from the culture-independent study, including indicator species presented in tables 2 and 3 and additional highly abundant clones.

| OTU | Accession number(s)              | Nearest relative [accession number]                                                            | % Identity to nearest relative | RDP classifier taxon (80% confidence threshold)      | Mean number of clones per sample category |    |      |   |
|-----|----------------------------------|------------------------------------------------------------------------------------------------|--------------------------------|------------------------------------------------------|-------------------------------------------|----|------|---|
|     |                                  |                                                                                                |                                |                                                      | H                                         | M  | D    | C |
| 560 | EU780383<br>EU780384             | Uncultured bacterium (diseased tissue of <i>Montastrea faveolata</i> (coral)) [FJ203036]       | 99                             | Unclassified<br>Gammaproteobacteria                  | 0                                         | <1 | 1.25 | 0 |
| 566 | EU780372                         | Uncultured bacterium (leaf packs in woodland stream) [GU568990]                                | 95                             | Chloroplast of <i>Bacillariophyta</i> (diatom)       | 0                                         | 1  | 1.5  | 0 |
| 604 | EU780385<br>EU780386<br>EU780387 | Uncultured organism associated with coral <i>Diploria strigosa</i> (coral) [GU119622]          | 98                             | Chloroplast of <i>Bacillariophyta</i> (diatom)       | 0                                         | <1 | 1.25 | 0 |
| 685 | EU780354<br>EU780353             | Uncultured diatom chloroplast (associated with <i>Montastrea faveolata</i> (coral)) [FJ403099] | 94                             | Chloroplast of <i>Bacillariophyta</i> (diatom)       | 0                                         | 0  | 4    | 0 |
| 706 | EU780373                         | Uncultured cyanobacterium (intertidal thrombolite) [GQ483866]                                  | 98                             | Cyanobacteria Family IV (genus GpIV)                 | 0                                         | 0  | 2    | 0 |
| 716 | EU780338<br>EU780337             | Uncultured bacterium (arctic stream) [FJ849120]                                                | 98                             | Chloroplast of <i>Bacillariophyta</i> (diatom)       | <1                                        | <1 | 9.5  | 0 |
| 724 | EU780346<br>EU780345             | Uncultured bacterium (leaf packs in woodland stream) [GU568990]                                | 95                             | Chloroplast of <i>Bacillariophyta</i> (diatom)       | 0                                         | <1 | 5.5  | 0 |
| 734 | EU780374                         | Uncultured bacterium (diseased tissue of <i>Montastrea faveolata</i> (coral)) [FJ203308]       | 99                             | Chloroplast of <i>Bacillariophyta</i> (diatom)       | 0                                         | 0  | 2    | 0 |
| 753 | EU780364                         | Chloroplast of uncultured eukaryote [EF491335]                                                 | 99                             | Chloroplast of <i>Bacillariophyta</i> (diatom)       | 0                                         | 0  | 2.5  | 0 |
| 759 | EU780335<br>EU780334             | Uncultured diatom chloroplast (sediment) [FM242284]                                            | 99                             | Chloroplast of <i>Bacillariophyta</i> (diatom)       | 0                                         | 0  | 2.5  | 0 |
| 763 | EU780333<br>EU780332             | Uncultured eukaryote plastid [HM262878]                                                        | 97                             | Chloroplast of <i>Bacillariophyta</i> (diatom)       | 0                                         | 0  | 4.75 | 0 |
| 806 | EU780329<br>EU780328             | Uncultured bacterium (marine microbial mat) [GQ441254]                                         | 99                             | Chloroplast of <i>Bacillariophyta</i> (diatom)       | 0                                         | <1 | 4.75 | 0 |
| 845 | EU780342<br>EU780341             | Uncultured bacterium (marine biofilm) [GU066447]                                               | 96                             | Flavobacteriaceae (genus <i>Winogradskyella</i> )    | <1                                        | 0  | 6.25 | 0 |
| 846 | EU780350<br>EU780349             | Uncultured bacterium (leaf packs in woodland stream) [GU568990]                                | 94                             | Chloroplast of <i>Bacillariophyta</i> (diatom)       | 0                                         | <1 | 5    | 0 |
| 862 | EU780390<br>EU780330             | Rhodobacteriaceae bacterium [AY177714]                                                         | 98                             | <i>Rhodobacteriaceae</i> (Genus <i>Roseovarius</i> ) | 0                                         | 0  | 1.5  | 0 |

\* Sample categories - C - Completely healthy coral colonies with no sign of ASWS, H - Apparently healthy tissue of colonies affected by ASWS, M - Margin of ASWS disease lesions, D - Exposed coral skeleton adjacent to margin of disease lesion

Table S1. Relative abundance of all sequenced clones from the culture-independent study, including indicator species presented in tables 2 and 3 and additional highly abundant clones.

| OTU  | Accession number(s)  | Nearest relative [accession number]                                                                      | % Identity to nearest relative | RDP classifier taxon (80% confidence threshold)             | Mean number of clones per sample category |     |      |    |
|------|----------------------|----------------------------------------------------------------------------------------------------------|--------------------------------|-------------------------------------------------------------|-------------------------------------------|-----|------|----|
|      |                      |                                                                                                          |                                |                                                             | H                                         | M   | D    | C  |
| 872  | EU780389<br>EU780388 | <i>Vibrio communis</i> [GU078673.1]                                                                      | 99                             | <i>Vibrionaceae</i> (Genus <i>Vibrio</i> )                  | 0                                         | <1  | 1    | <1 |
| 874  | EU780352<br>EU780351 | Uncultured bacterium (coastal microbial mat) [GQ441312]                                                  | 97                             | Chloroplast of <i>Bacillariophyta</i> (diatom)              | 0                                         | 0   | 5    | 0  |
| 1015 | EU780340<br>EU780339 | <i>Thalassobius</i> sp. SC027 [FJ889533]                                                                 | 97                             | Rhodobactereaceae (Unclassified)                            | <1                                        | 1   | 5.75 | 0  |
| 1206 | EU780369             | Uncultured bacterium (marine hydrocarbon seep) [GU584528]                                                | 97                             | Rhodobactereaceae (Unclassified)                            | <1                                        | 0   | 1.75 | <1 |
| 1264 | EU780361<br>EU780360 | Uncultured bacterium (marine hydrocarbon seep) [GU584528]                                                | 97                             | Rhodobactereaceae (Unclassified)                            | <1                                        | 1   | 2.5  | 0  |
| 1427 | EU780366<br>EU780365 | Uncultured deep-sea bacterium [AM997664]                                                                 | 95                             | Unclassified Flavobacteriales                               | 0                                         | 0   | 2.5  | 0  |
| 1489 | EU780367             | Uncultured bacterium (diseased tissue of <i>Montastrea faveolata</i> (coral)) [FJ203253]                 | 99                             | Rhodobactereaceae (Unclassified)                            | <1                                        | 1.5 | 1.5  | 0  |
| 1575 | EU780375             | Uncultured alphaproteobacterium (submerged artificial inert substrate) [EU005320]                        | 96                             | Rhodobactereaceae (Unclassified)                            | 0                                         | <1  | 1.75 | 0  |
| 1740 | EU780358             | Uncultured bacterium (diseased tissue of <i>Montastrea faveolata</i> ) [FJ203103]                        | 99                             | Rhodobactereaceae (Unclassified)                            | <1                                        | <1  | 3    | 0  |
| 2073 | EU780348<br>EU780347 | Uncultured bacterium ( <i>Montastrea faveolata</i> (coral) in aquarium) [FJ202903]                       | 99                             | Clostridiales Incertae Sedis XII (genus <i>Fusibacter</i> ) | 0                                         | 1   | 5    | 0  |
| 2112 | EU780391             | Uncultured bacterium associated with diseased tissue of <i>Montastrea faveolata</i> (coral) [FJ203253.1] | 99                             | <i>Rhodobactereaceae</i> (Unclassified)                     | 0                                         | <1  | 1.25 | 0  |
| 2365 | EU780392             | Uncultured bacterium associated with diseased tissue of <i>Montastrea faveolata</i> (coral) [FJ203196]   | 99                             | <i>Cohaesibacteraceae</i> (Genus <i>Cohaesibacter</i> )     | <1                                        | 0   | 1.25 | 0  |
| 2469 | EU780393             | Uncultured bacterium associated with diseased tissue of <i>Montastrea faveolata</i> (coral) [FJ203089.1] | 99                             | <i>Rhodobactereaceae</i> (Unclassified)                     | 0                                         | 0   | 1.5  | 0  |
| 2476 | EU780395<br>EU780394 | Uncultured gammaproteobacterium associated with body wall lesions of sea urchin [AM930470]               | 99                             | <i>Oceanospirillaceae</i> (Genus <i>Neptunomonas</i> )      | 0                                         | 0   | 1.5  | 0  |
| 2486 | EU780359             | <i>Shimia marina</i> [AY962292]                                                                          | 99                             | Rhodobactereaceae (Genus <i>Shimia</i> )                    | 0                                         | 0   | 3.25 | 0  |
| 2499 | EU780363             | Uncultured bacterium (marine hydrocarbon seep) [GU584528]                                                | 97                             | Rhodobactereaceae (Unclassified)                            | 0                                         | 0   | 2.75 | 0  |

\* Sample categories - C - Completely healthy coral colonies with no sign of ASWS, H - Apparently healthy tissue of colonies affected by ASWS, M - Margin of ASWS disease lesions, D - Exposed coral skeleton adjacent to margin of disease lesion

Table S1. Relative abundance of all sequenced clones from the culture-independent study, including indicator species presented in tables 2 and 3 and additional highly abundant clones.

| OTU  | Accession number(s)  | Nearest relative [accession number]                                                                              | % Identity to nearest relative | RDP classifier taxon (80% confidence threshold)       | Mean number of clones per sample category |     |      |     |
|------|----------------------|------------------------------------------------------------------------------------------------------------------|--------------------------------|-------------------------------------------------------|-------------------------------------------|-----|------|-----|
|      |                      |                                                                                                                  |                                |                                                       | H                                         | M   | D    | C   |
| 2509 | EU780368             | Uncultured bacteroidetes bacterium (body wall lesions of sea urchin) [AM930459]                                  | 95                             | Cryomorphaceae (unclassified)                         | 0                                         | 0   | 2.5  | 0   |
| 2522 | EU780376<br>EU780377 | Uncultured bacterium (diseased tissue of Montastrea faveolata (coral)) [FJ203089]                                | 99                             | Rhodobactereaceae (Unclassified)                      | 0                                         | 0   | 2    | 0   |
| 2527 | EU780396             | Uncultured bacterium (from marine hydrocarbon seep) [GU584528.1]                                                 | 96                             | <i>Rhodobactereaceae</i> (Unclassified)               | 0                                         | 0   | 1.5  | 0   |
| 467  | EU780379<br>EU780380 | Uncultured bacterium from coral mucus [FJ930674]                                                                 | 96                             | Unclassified<br>Gammaproteobacteria                   | 0                                         | 1   | 1    | 0   |
| 518  | EU780378             | Uncultured alphaproteobacterium (marine sediment) [DQ289933]                                                     | 98                             | Rhodobactereaceae (Unclassified)                      | 0                                         | 1   | 1.25 | 0   |
| 175  | EU780226<br>EU379566 | Uncultured alpha proteobacterium from squid mucus [AJ633968]                                                     | 99                             | <i>Rhodobactereaceae</i> (Genus <i>Silicibacter</i> ) | 56                                        | 129 | 34   | 21  |
| 204  | EU780422<br>EU780421 | Marine bacterium ATAM173a_16 [AF359531] isolated from a culture of <i>Alexandrium tamarense</i> (dinoflagellate) | 96                             | <i>Rhodobactereaceae</i> (unclassified)               | 2.333                                     | 7   | 4    | 5.5 |
| 210  | EU780230<br>EU780229 | <i>Thalassobius mediterraneus</i> [AJ878874]                                                                     | 99                             | <i>Rhodobactereaceae</i> (unclassified)               | 3                                         | 12  | 5    | 1   |
| 265  | EU780267<br>EU780268 | Uncultured bacterium (from sponge) [AY845242]                                                                    | 98                             | <i>Rhodobactereaceae</i> (Genus <i>Roseobacter</i> )  | 10                                        | 26  | 19   | 4   |
| 307  | EU780276<br>EU780275 | Rhodobacteraceae bacterium [AY177714]                                                                            | 98                             | <i>Rhodobactereaceae</i> (Genus <i>Roseovarius</i> )  | 1.667                                     | 2.5 | 1    | 1   |
| 329  | EU780228<br>EU780227 | Rhodobacteraceae bacterium [AY177714]                                                                            | 98                             | <i>Rhodobactereaceae</i> (Genus <i>Roseovarius</i> )  | 1.667                                     | 17  | 3.5  | 2.5 |
| 384  | EU780250<br>EU780249 | Rhodobacteraceae bacterium [AY177714]                                                                            | 98                             | <i>Rhodobactereaceae</i> (Genus <i>Roseovarius</i> )  | 1                                         | 2   | <1   | 0   |
| 388  | EU780274<br>EU780273 | Rhodobacteraceae bacterium [AJ810844]                                                                            | 96                             | <i>Rhodobactereaceae</i> (unclassified)               | <1                                        | 4   | 1.75 | 0   |
| 429  | EU780238<br>EU780237 | Algal Chloroplast [X76084]                                                                                       | 92                             | Unclassified cyanobacteria                            | 1.333                                     | 8   | <1   | <1  |
| 449  | EU780234<br>EU780233 | Uncultured alpha proteobacterium (from squid) [AJ633989]                                                         | 96                             | <i>Rhodobactereaceae</i> (unclassified)               | 0                                         | 7   | 2.5  | 0   |
| 452  | EU780244<br>EU780243 | Uncultured bacterium (from seafloor sediment) [AY35417]                                                          | 90                             | Unclassified<br>Gammaproteobacteria                   | 0                                         | 5   | <1   | 0   |

\* Sample categories - C - Completely healthy coral colonies with no sign of ASWS, H - Apparently healthy tissue of colonies affected by ASWS, M - Margin of ASWS disease lesions, D - Exposed coral skeleton adjacent to margin of disease lesion

Table S1. Relative abundance of all sequenced clones from the culture-independent study, including indicator species presented in tables 2 and 3 and additional highly abundant clones.

| OTU | Accession number(s)  | Nearest relative [accession number]                                                                                            | % Identity to nearest relative | RDP classifier taxon (80% confidence threshold)      | Mean number of clones per sample category |     |      |     |
|-----|----------------------|--------------------------------------------------------------------------------------------------------------------------------|--------------------------------|------------------------------------------------------|-------------------------------------------|-----|------|-----|
|     |                      |                                                                                                                                |                                |                                                      | H                                         | M   | D    | C   |
| 459 | EU780246<br>EU780245 | Uncultured epsilon proteobacterium (deep sea isolate) [AB113178]                                                               | 90                             | Unclassified Bacteria                                | 0                                         | 4.5 | <1   | 0   |
| 469 | EU780272<br>EU780271 | Marine alpha proteobacterium [AJ391182]                                                                                        | 93                             | <i>Rhodobactereaceae</i> (unclassified)              | 2                                         | 5   | 2.25 | 1.5 |
| 480 | EU780232<br>EU780231 | <i>Thalassobius mediterraneus</i> [AJ878874]                                                                                   | 99                             | <i>Rhodobactereaceae</i> (unclassified)              | <1                                        | 10  | 3.5  | 2   |
| 491 | EU780270<br>EU780269 | Uncultured bacterium (sea sediment) [AY373402]                                                                                 | 93                             | Unclassified Gammaproteobacteria                     | <1                                        | 10  | 5.5  | 0   |
| 497 |                      | Rhodobacteraceae bacterium (from fish farm biofilm) [AY962292]                                                                 | 96                             | <i>Rhodobactereaceae</i> (unclassified)              | <1                                        | 6.5 | 3.75 | 3   |
| 521 | EU780240<br>EU780239 | Uncultured bacterium (from sponge) [AY845242]                                                                                  | 98                             | <i>Rhodobactereaceae</i> (Genus <i>Roseovarius</i> ) | 1.333                                     | 5   | 2    | 0   |
| 525 | EU780258<br>EU780257 | Uncultured <i>Thiothrix</i> (from marine amphipod) [AY426613]                                                                  | 92                             | <i>Thiotrichaceae</i> (Genus <i>Thiotrix</i> )       | 0                                         | 2   | <1   | 0   |
| 530 | EU780236<br>EU780235 | <i>Roseovarius crassostereae</i> [AF114484] tied with CVSP bacterium [AF114485] (both associated with juvenile oyster disease) | 97                             | <i>Rhodobactereaceae</i> (Genus <i>Jannaschia</i> )  | <1                                        | 11  | 2    | 0   |
| 534 | EU780260<br>EU780259 | Uncultured alpha proteobacterium (associated with black band disease in corals) [AF473915]                                     | 97                             | <i>Rhodobactereaceae</i> (unclassified)              | 0                                         | 3   | <1   | 0   |
| 539 | EU780254<br>EU780253 | Uncultured Bacteroidetes (from hypersaline microbial mat) [DQ330308]                                                           | 89                             | <i>Saprospiraceae</i> (Unclassified)                 | 0                                         | 3.5 | 0    | 0   |
| 562 | EU780278<br>EU780277 | Flavobacterium (artic marine sediment) [DQ514308]                                                                              | 93                             | <i>Flavobacteriaceae</i> (Genus <i>Algibacter</i> )  | 0                                         | 3.5 | 1.25 | 1   |
| 601 | EU780420<br>EU780419 | Uncultured gamma proteobacteria (associated with coral tissue) [DQ200616]                                                      | 89                             | Unclassified Gammaproteobacteria                     | 0                                         | 2   | 2    | 0   |
| 609 | EU780262<br>EU780261 | Marine Flavobacterium [AY028207]                                                                                               | 95                             | <i>Flavobacteriaceae</i> (Unclassified)              | 0                                         | 2   | <1   | 0   |
| 616 | EU780248<br>EU780247 | <i>Thiothrix</i> sp. (marine isolate) [DQ067608]                                                                               | 96                             | <i>Thiotrichaceae</i> (Genus <i>Thiotrix</i> )       | 0                                         | 5.5 | <1   | 0   |
| 851 | EU780280<br>EU780279 | <i>Plectonema</i> sp. (cyanobacterium) [AF091110]                                                                              | 94                             | Unclassified cyanobacteria                           | 0                                         | 3.5 | 1.5  | 0   |

\* Sample categories - C - Completely healthy coral colonies with no sign of ASWS, H - Apparently healthy tissue of colonies affected by ASWS, M - Margin of ASWS disease lesions, D - Exposed coral skeleton adjacent to margin of disease lesion

Table S1. Relative abundance of all sequenced clones from the culture-independent study, including indicator species presented in tables 2 and 3 and additional highly abundant clones.

| OTU  | Accession number(s)  | Nearest relative [accession number]                                                                                            | % Identity to nearest relative | RDP classifier taxon (80% confidence threshold)             | Mean number of clones per sample category |     |    |     |
|------|----------------------|--------------------------------------------------------------------------------------------------------------------------------|--------------------------------|-------------------------------------------------------------|-------------------------------------------|-----|----|-----|
|      |                      |                                                                                                                                |                                |                                                             | H                                         | M   | D  | C   |
| 1017 | EU780282<br>EU780281 | Uncultured marine bacterium [DQ071069]                                                                                         | 96                             | <i>Verrucomicrobiaceae</i> (Genus <i>Verrucomicrobium</i> ) | 1                                         | 1.5 | <1 | 0.5 |
| 1310 | EU780252<br>EU780251 | Three-way tie; <i>Pleurocapsa</i> sp. [X78681], <i>Myxosarcina</i> sp. [AJ344561], <i>Pleurocapsa</i> sp. [AJ344561]           | 95                             | Unclassified subsection 2<br>Cyanobacteria                  | <1                                        | 3   | <1 | 0   |
| 1574 | EU780256<br>EU780255 | <i>Thalassobius mediterraneus</i> [AJ878874]                                                                                   | 97                             | <i>Rhodobactereaceae</i><br>(unclassified)                  | 0                                         | 2.5 | <1 | <1  |
| 2011 | EU780264<br>EU780263 | Marine bacterium <i>Flavobacterium</i> [AY028207]                                                                              | 95                             | <i>Flavobacteriaceae</i><br>(Unclassified)                  | 0                                         | 2.5 | <1 | 0   |
| 2049 | EU780284<br>EU780283 | <i>Roseovarius crassostereae</i> [AF114484] tied with CVSP bacterium [AF114485] (both associated with juvenile oyster disease) | 96                             | <i>Rhodobactereaceae</i><br>(unclassified)                  | 0                                         | 2   | 1  | 0   |
| 2051 | EU780242<br>EU780241 | Marine bacterium <i>Flavobacterium</i> [AY028207]                                                                              | 95                             | <i>Flavobacteriaceae</i><br>(Unclassified)                  | 0                                         | 9.5 | <1 | 0   |
| 2094 | EU780266<br>EU780265 | <i>Thiothrix</i> sp. [DQ067608]                                                                                                | 96                             | <i>Thiotrichaceae</i> (Genus <i>Thiotrix</i> )              | 0                                         | 3   | 0  | 0   |

\* Sample categories - C - Completely healthy coral colonies with no sign of ASWS, H - Apparently healthy tissue of colonies affected by ASWS, M - Margin of ASWS disease lesions, D - Exposed coral skeleton adjacent to margin of disease lesion
