# Supplementary material for: The Role of Coral-Associated Bacterial Communities in Australian Subtropical White Syndrome of Turbinaria mesenterina
Source: PubMed Central journal article supplement (PMC3435329; doi:10.1371/journal.pone.0044243), 2012-09-06
Supplement: pone.0044243.s002.pdf [file pone.0044243.s002.pdf]

Table S2. Accession numbers and details of BLAST and RDP classifier analysis for culturable bacteria isolated from *Turbinaria mesenterina*

| Isolate Name | Accession number(s) | Sample category* | RDP Classifier Taxon (80% confidence threshold)          | Nearest Relative [accession number]                         | % Identity to nearest relative |
|--------------|---------------------|------------------|----------------------------------------------------------|-------------------------------------------------------------|--------------------------------|
| 2.3.053CC3   | EU267644            | C                | Flavobacteriaceae (genus <i>Winogradskyella</i> )        | Winogradskyella poriferorum strain UST030701-295 [AY848823] | 97%                            |
| 2.3.053CC4   | EU267623            | C                | Rhodobacteraceae (genus <i>Ruegeria</i> )                | <i>Ruegeria atlantica</i> [JN128252]                        | 100%                           |
| 4.5.0412CS1  | EU276994            | C                | Vibrionaceae (genus <i>Vibrio</i> )                      | Bacterium WP2ISO14 [DQ985841]                               | 97%                            |
| 4.5.0412CS2a | EU267654            | C                | Vibrionaceae (genus <i>Vibrio</i> )                      | Bacterium WP2ISO6 [DQ985833]                                | 98%                            |
| 4.5.0412CS3  | EU267612            | C                | Vibrionaceae (genus <i>Vibrio</i> )                      | Bacterium WP3ISO9 [DQ985870]                                | 99%                            |
| 4.5.0412CS4  | EU267616            | C                | Vibrionaceae (genus <i>Vibrio</i> )                      | Bacterium WP2ISO14 [DQ985841]                               | 99%                            |
| 4.5.0412CS7  | EU276996            | C                | Vibrionaceae (genus <i>Photobacterium</i> )              | Photobacterium lutimaris strain DF-42 [DQ534014]            | 97%                            |
| 4.5.0412CS8  |                     | C                | Vibrionaceae (genus <i>Vibrio</i> )                      | <i>Vibrio</i> sp. V639 [DQ146989]                           | 98%                            |
| 4.5.0412CS9  | EU267624            | C                | Vibrionaceae (genus <i>Photobacterium</i> )              | Photobacterium sp. YL2 [EF187015]                           | 99%                            |
| 4.5.0412CS11 | EU277000            | C                | Vibrionaceae (genus <i>Vibrio</i> )                      | <i>Vibrio</i> sp. V051 [DQ146974]                           |                                |
| 4.5.0412CS12 | EU276992            | C                | Rhodobacteraceae (genus <i>Paracoccus</i> )              | Paracoccus sp. JL1105 [DQ985064]                            | 97%                            |
| 2.3.052HS1   | EU267665            | H                | Unclassified Gammaproteobacteria                         | Uncultured <i>Vibrio</i> sp. clone 12 [AY785252]            | 93%                            |
| 2.3.052HS2   | EU267640            | H                | Vibrionaceae (genus <i>Vibrio</i> )                      | <i>Vibrio</i> sp. YASM14 [DQ314529]                         | 97%                            |
| 2.3.053HC2   | EU267668            | H                | Moraxellaceae (genus <i>Psychrobacter</i> )              | <i>Psychrobacter celer</i> strain KOPRI24932 [EF101550]     | 99%                            |
| 2.3.053HS1   | EU267669            | H                | Unclassified Rhodobacteraceae                            | Rhodobacteraceae bacterium CL-TA03 [AY962292]               | 97%                            |
| 2.3.053HS2   | EU267629            | H                | Shewanellaceae (genus <i>Shewanella</i> )                | <i>Shewanella</i> sp. C321 [DQ005902]                       | 99%                            |
| 2.3.053HS3   | EU267634            | H                | Vibrionaceae (genus <i>Vibrio</i> )                      | <i>Vibrio</i> sp. HB-8 [AY876051]                           | 97%                            |
| 2.3.053HS5   | EU267635            | H                | Pseudoalteromonadaceae (genus <i>Pseudoalteromonas</i> ) | Marine bacterium LMG1 [AY082666]                            | 98%                            |

\* Sample categories - C - Completely healthy coral colonies with no sign of ASWS, H - Apparently healthy tissue of colonies affected by ASWS, M - Margin of ASWS disease lesions, D - Exposed coral skeleton adjacent to margin of disease lesion

Table S2. Accession numbers and details of BLAST and RDP classifier analysis for culturable bacteria isolated from *Turbinaria mesenterina*

| Isolate Name | Accession number(s)  | Sample category* | RDP Classifier Taxon (80% confidence threshold) | Nearest Relative [accession number]                         | % Identity to nearest relative |
|--------------|----------------------|------------------|-------------------------------------------------|-------------------------------------------------------------|--------------------------------|
| 4.5.0412HS1  | EU267656             | H                | Vibrionaceae (genus <i>Vibrio</i> )             | Bacterium WP2ISO14 [DQ985841]                               | 99%                            |
| 4.5.0412HS3  | EU277002             | H                | Vibrionaceae (genus <i>Vibrio</i> )             | <i>Vibrio</i> sp. A2 [EF467288]                             | 98%                            |
| 4.5.0412HS4  | EU276998             | H                | Vibrionaceae (genus <i>Vibrio</i> )             | Bacterium WP2ISO14 [DQ985841]                               | 97%                            |
| 2.3.052MS2   | EU267650             | M                | unclassified Gammaproteobacteria                | Uncultured <i>Vibrio</i> sp. clone 12 [AY785252]            | 94%                            |
| 2.3.052MS3   | EU267662             | M                | Vibrionaceae (genus <i>Vibrio</i> )             | <i>Vibrio harveyi</i> strain LB4 [DQ146935]                 | 99%                            |
| 2.3.052MS5   | EU267643             | M                | Vibrionaceae (genus <i>Vibrio</i> )             | Bacterium WP2ISO12 [DQ985839]                               | 99%                            |
| 2.3.053MS1   | EU267636             | M                | Unclassified Rhodobacteraceae                   | Uncultured alpha proteobacterium clone JL-ECS-X8 [AY663968] | 96%                            |
| 2.3.053MS2   | EU267638             | M                | Rhodobacteraceae (genus <i>Silicibacter</i> )   | Rhodobacteraceae bacterium CL-TA03 [AY962292]               | 94%                            |
| 2.3.053MS3   | EU267639             | M                | Vibrionaceae (genus <i>Vibrio</i> )             | <i>Vibrio harveyi</i> strain LB4 [DQ146935]                 | 98%                            |
| 2.3.053MS4   | EU267647             | M                | Vibrionaceae (genus <i>Vibrio</i> )             | <i>Vibrio harveyi</i> strain LB4 [DQ146935]                 | 99%                            |
| 2.3.053MS5   | EU267670             | M                | Vibrionaceae (genus <i>Vibrio</i> )             | Bacterium WP2ISO6 [DQ985833]                                | 98%                            |
| 4.5.0412MS1  | EU276989             | M                | Vibrionaceae (genus <i>Vibrio</i> )             | Bacterium WP3ISO9 [DQ985870]                                | 98%                            |
| 4.5.0412MS2  | EU276993             | M                | Vibrionaceae (genus <i>Vibrio</i> )             | <i>Vibrio</i> sp. PH1 [AF513461]                            | 97%                            |
| 4.5.0412MS3  | EU276999             | M                | Vibrionaceae (genus <i>Vibrio</i> )             | <i>Vibrio harveyi</i> strain LB4 [DQ146935]                 | 97%                            |
| 4.5.0412MS4  | EU267657<br>EU276995 | M                | Vibrionaceae (genus <i>Vibrio</i> )             | <i>Vibrio</i> sp. BA2 [EF187016]                            | 97%                            |
| 4.5.0412MS5  | EU276990             | M                | Vibrionaceae (genus <i>Vibrio</i> )             | Bacterium WP3ISO9 [DQ985870]                                | 98%                            |
| 4.5.0412MS6  | EU267653<br>EU259885 | M                | Vibrionaceae (genus <i>Vibrio</i> )             | Bacterium WP3ISO10 [DQ985871]                               | 99%                            |
| 4.5.0412MS7  | EU267659             | M                | Vibrionaceae (genus <i>Vibrio</i> )             | Bacterium WP2ISO9 [DQ985836]                                | 98%                            |

\* Sample categories - C - Completely healthy coral colonies with no sign of ASWS, H - Apparently healthy tissue of colonies affected by ASWS, M - Margin of ASWS disease lesions, D - Exposed coral skeleton adjacent to margin of disease lesion

Table S2. Accession numbers and details of BLAST and RDP classifier analysis for culturable bacteria isolated from *Turbinaria mesenterina*

| Isolate Name | Accession number(s) | Sample category* | RDP Classifier Taxon (80% confidence threshold)          | Nearest Relative [accession number]                    | % Identity to nearest relative |
|--------------|---------------------|------------------|----------------------------------------------------------|--------------------------------------------------------|--------------------------------|
| 2.3.052DS1   | EU267664            | D                | Ferrimonidaceae (genus <i>Ferrimonas</i> )               | Ferrimonas kyonanensis [AB245514]                      | 97%                            |
| 2.3.052DS2   | EU267642            | D                | Vibrionaceae (genus <i>Vibrio</i> )                      | Vibrio sp. R-14939, strain R-14939 [AJ316187]          | 96%                            |
| 2.3.052DS3   | EU267648            | D                | Vibrionaceae (genus <i>Vibrio</i> )                      | Vibrio sp. V639 [DQ146989]                             | 98%                            |
| 2.3.052DS4   | EU267630            | D                | Vibrionaceae (genus <i>Vibrio</i> )                      | Vibrio harveyi strain LB4 [DQ146935]                   | 99%                            |
| 2.3.052DS5   | EU267649            | D                | Unclassified Rhodobacteraceae                            | Rhodobacteraceae bacterium CL-TA03 [AY962292]          | 96%                            |
| 2.3.053DC1   | EU267631            | D                | Vibrionaceae (genus <i>Vibrio</i> )                      | Vibrio harveyi strain LB4 [DQ146935]                   | 97%                            |
| 2.3.053DC2   | EU267632            | D                | Rhodobacteraceae (genus <i>Silicibacter</i> )            | Rhodobacteraceae bacterium CL-TA03 [AY962292]          | 96%                            |
| 2.3.053DC3   | EU267666            | D                | Vibrionaceae (genus <i>Vibrio</i> )                      | Uncultured gamma proteobacterium clone UA07 [DQ269050] | 97%                            |
| 2.3.053DC4   | EU267651            | D                | Unclassified Rhodobacteraceae                            | Rhodobacteraceae bacterium CL-TA03 [AY962292]          | 98%                            |
| 2.3.053DC5   |                     | D                | Unclassified Gammaproteobacteria                         | Vibrio sp. V068 [DQ146975]                             | 97%                            |
| 2.3.053DC6   | EU267633            | D                | Vibrionaceae (genus <i>Vibrio</i> )                      | Bacterium WP2ISO12 [DQ985839]                          | 94%                            |
| 2.3.053DC8   | EU267637            | D                | Unclassified Rhodobacteraceae                            | Unidentified bacterium clone WP2OTU8 [DQ985908]        | 96%                            |
| 2.3.053DC9   | EU267645            | D                | Vibrionaceae (genus <i>Vibrio</i> )                      | Vibrio sp. HB-8 [AY876051]                             | 98%                            |
| 2.3.053DS1   | EU267646            | D                | Unclassified Rhodobacteraceae                            | Rhodobacteraceae bacterium CL-TA03 [AY962292]          | 98%                            |
| 2.3.053DS2   | EU267641            | D                | Pseudoalteromonadaceae (genus <i>Pseudoalteromonas</i> ) | Unidentified bacterium clone WP2OTU33 [DQ985917]       | 96%                            |

\* Sample categories - C - Completely healthy coral colonies with no sign of ASWS, H - Apparently healthy tissue of colonies affected by ASWS, M - Margin of ASWS disease lesions, D - Exposed coral skeleton adjacent to margin of disease lesion

Table S2. Accession numbers and details of BLAST and RDP classifier analysis for culturable bacteria isolated from *Turbinaria mesenterina*

| Isolate Name | Accession number(s) | Sample category* | RDP Classifier Taxon (80% confidence threshold)          | Nearest Relative [accession number]                        | % Identity to nearest relative |
|--------------|---------------------|------------------|----------------------------------------------------------|------------------------------------------------------------|--------------------------------|
| 2.3.053DS3   | EU267667            | D                | Vibrionaceae (genus <i>Vibrio</i> )                      | <i>Vibrio</i> sp. LC1-199 [AB239472]                       | 99%                            |
| 2.3.053DS4   | EU267652            | D                | Incertae sedis 7 (genus <i>Agarivorans</i> )             | <i>Agarivorans</i> albus, strain:MKT112 [AB076562]         | 96%                            |
| 4.5.0412DS1  | EU267608            | D                | Vibrionaceae (genus <i>Vibrio</i> )                      | Bacterium WP2ISO14 [DQ985841]                              | 97%                            |
| 4.5.0412DS2  | EU267617            | D                | Vibrionaceae (genus <i>Vibrio</i> )                      | Bacterium WP3ISO9 [DQ985870]                               | 97%                            |
| 4.5.0412DS3a | EU276997            | D                | Vibrionaceae (genus <i>Vibrio</i> )                      | Uncultured bacterium isolate LCPISO4 [DQ831087]            | 95%                            |
| 4.5.0412DS4  | EU267655            | D                | Vibrionaceae (genus <i>Vibrio</i> )                      | Bacterium WP2ISO14 [DQ985841]                              | 98%                            |
| 4.5.0412DS6  | EU276991            | D                | Vibrionaceae (genus <i>Vibrio</i> )                      | Bacterium WP3ISO9 [DQ985870]                               | 96%                            |
| 4.5.0412DS8  | EU267609            | D                | Pseudoalteromonadaceae (genus <i>Pseudoalteromonas</i> ) | Bacterium WP3ISO11 [DQ985872]                              | 96%                            |
| 4.5.0412DS11 | EU277001            | D                | Vibrionaceae (genus <i>Enterovibrio</i> )                | <i>Enterovibrio</i> norvegicus strain LMG 19842 [AJ437193] | 98%                            |

\* Sample categories - C - Completely healthy coral colonies with no sign of ASWS, H - Apparently healthy tissue of colonies affected by ASWS, M - Margin of ASWS disease lesions, D - Exposed coral skeleton adjacent to margin of disease lesion
